# Supplementary material for: Tailoring the electronic properties among oxoarsine, arsinoyl and arsine oxide isomers: the simplest molecular systems with an arsenic–oxygen bond
Source: Royal Society of Chemistry journal article supplement (doi:10.1039/c6ra09517h), 2016-01-01
Supplement: c6ra09517h1.pdf [file c6ra09517h1.pdf]

# Supplementary material

## **Tailoring the electronic properties among oxoarsine, arsinoyl and arsine oxide isomers: the simplest molecular systems with an arsenic-oxygen bond**

Rommel B. Viana\*

Departamento de Química e Física Molecular, Instituto de Química de São Carlos, Universidade de São Paulo, São Carlos-SP, Brasil.

\* Corresponding author:

E-mail: [rommelbv@yahoo.com.br](mailto:rommelbv@yahoo.com.br)

Av. Trabalhador São Carlense, 400 (caixa-postal: 780). Bairro: Centro. CEP: 13560970 - São Carlos, SP – Brazil.

**Table S1.** Relative energy gap (in kcal mol<sup>-1</sup>) among the HAsO isomers

| Method                    | i1  | i2   | i3   | i4   |
|---------------------------|-----|------|------|------|
| CCSD(T)/CBS               | 0.0 | 37.4 | 18.0 | 1.2  |
| QCISD(T,Full)/aug-cc-pVQZ | 0.0 | 37.4 | 19.8 | 2.8  |
| G4*                       | 0.0 | 39.8 | 16.8 | 2.3  |
| G4MP2*                    | 0.0 | 40.2 | 17.1 | 2.4  |
| G4                        | 0.0 | 37.5 | 14.6 | -2.2 |
| G4MP2                     | 0.0 | 39.8 | 14.8 | -2.2 |

**Table S2.** The zero-point vibrational energy (ZPVE, in kcal mol<sup>-1</sup>) obtained with three different methodologies among the AsOH<sub>n</sub> isomers (n=0-3)

| Radical    | QCISD | G4    | $\Delta_{\text{ZPVE(QCISD-G4)}}$ | B3LYP/cc-pVTZ | $\Delta_{\text{ZPVE(QCISD-B3LYP)}}$ |
|------------|-------|-------|----------------------------------|---------------|-------------------------------------|
| AsO        | 1.42  | 1.42  | 0.00                             | 1.44          | -0.02                               |
| <b>i1</b>  | 5.62  | 7.6   | -1.97                            | 5.40          | 0.23                                |
| <b>i2</b>  | 4.97  | 4.69  | 0.28                             | 4.68          | 0.28                                |
| <b>i3</b>  | 8.05  | 7.78  | 0.27                             | 7.86          | 0.19                                |
| <b>i4</b>  | 7.89  | 5.36  | 2.53                             | 7.68          | 0.21                                |
| <b>i5</b>  | 12.81 | 12.33 | 0.48                             | 12.43         | 0.38                                |
| <b>i6</b>  | 13.08 | 12.59 | 0.49                             | 12.70         | 0.37                                |
| <b>i7</b>  | 10.98 | 14.95 | -3.97                            | 10.47         | 0.51                                |
| <b>i8</b>  | 15.41 | 10.37 | 5.04                             | 18.02         | -2.61                               |
| <b>i9</b>  | 17.75 | 18.01 | -0.26                            | 16.88         | 0.88                                |
| <b>i10</b> | 18.83 | 17.96 | 0.87                             | 18.13         | 0.7                                 |
| <b>i11</b> | 18.83 | 16.65 | 2.17                             | 18.08         | 0.74                                |
| <b>i12</b> | 20.11 | 19.45 | 0.66                             | 19.59         | 0.52                                |
| <b>i13</b> | 20.11 | 19.4  | 0.71                             | 19.56         | 0.55                                |

**Table S3.** Calculated and experimental vibrational frequencies (in cm<sup>-1</sup>) of HAsO (**i1**), as well as the mean unassigned error (MUE) and mean absolute error (MAE) in to the prediction of the frequencies

| Method              | $\nu_1$      | $\nu_2$      | $\nu_3$       | reference  | MUE | MAE |
|---------------------|--------------|--------------|---------------|------------|-----|-----|
| QCISD/cc-pVTZ       | 881.2        | 988.2        | 2064.5        | This study | 78  | 37  |
| B3LYP/cc-pVTZ       | 853.2        | 979.7        | 1942.4        | This study | 25  | 12  |
| G4                  | 728.0        | 1011.5       | 3783.1        | This study | 607 | 830 |
| B3LYP/aug-cc-pV5Z   | 849          | 974          | 1970          | [53]       | 31  | 10  |
| CCSD(T)/aug-cc-pV5Z | 864          | 961          | 2027          | [53]       | 51  | 30  |
| <b>Experimental</b> | <b>832.4</b> | <b>937.0</b> | <b>1931.0</b> | [53]       |     |     |

**Table S4.** Calculated and experimental vibrational frequencies (in  $\text{cm}^{-1}$ ) of  $\text{H}_2\text{AsO}$  (**i7**), as well as the mean unassigned error (MUE) and mean absolute error (MAE) in to the prediction of the frequencies

| Method                    | $\nu_1$ | $\nu_2$ | $\nu_3$ | $\nu_4$ | $\nu_5$ | $\nu_6$ | Reference  | MUE | MAE |
|---------------------------|---------|---------|---------|---------|---------|---------|------------|-----|-----|
| QCISD/cc-pVTZ             | 535.33  | 746.85  | 867.11  | 1010.01 | 2244.31 | 2275.3  | This study | 81  | 70  |
| B3LYP/cc-pVTZ             | 546.39  | 720.72  | 843.5   | 980.62  | 2098.68 | 2135.03 | This study | 34  | 21  |
| G4                        | 547.74  | 719.79  | 843.56  | 981.98  | 2115.83 | 2151.83 | This study | 39  | 27  |
| B3LYP/6-311G(d,p)         | 519     | 717     | 806     | 994     | 2100    | 2137    | [51]       | 22  | 41  |
| QCISD/6-311G(d,p)         | 497     | 741     | 807     | 1032    | 2203    | 2224    | [51]       | 51  | 82  |
| CCSD(T)/6-311G(d,p)       | 454     | 733     | 812     | 1021    | 2178    | 2204    | [51]       | 33  | 82  |
| CCSD/6-311G(d,p)          | 451     | 754     | 808     | 1039    | 2214    | 2234    | [51]       | 45  | 97  |
| B3LYP/6-311++G(3df,3pd)   | 538     | 716     | 843     | 978     | 2105    | 2144    | [51]       | 33  | 25  |
| QCISD/6-311++G(3df,3pd)   | 520     | 735     | 859     | 994     | 2203    | 2229    | [51]       | 61  | 60  |
| CCSD(T)/6-311++G(3df,3pd) | 507     | 712     | 875     | 973     | 2174    | 2206    | [51]       | 49  | 51  |
| CCSD/6-311++G(3df,3pd)    | 499     | 743     | 880     | 1003    | 2239    | 2267    | [51]       | 72  | 72  |
| B3LYP/aug-cc-pVTZ         | 541     | 717     | 841     | 975     | 2105    | 2144    | [51]       | 33  | 26  |
| QCISD/aug-cc-pVTZ         | 524     | 738     | 863     | 1003    | 2235    | 2272    | [51]       | 73  | 70  |
| CCSD(T)/aug-cc-pVTZ       | 515     | 705     | 878     | 981     | 2204    | 2244    | [51]       | 61  | 60  |
| CCSD/aug-cc-pVTZ          | 485     | 750     | 883     | 1014    | 2260    | 2302    | [51]       | 77  | 80  |
| Experimental              | 525.7   |         | 838.7   | 946.1   | 2022.9  |         | [52]       |     |     |

**Table S5.** Energetic profile (in  $\text{kcal mol}^{-1}$ ) among the  $\text{H}_2\text{AsO}$  isomers

| Reaction           | CCSD(T)/CBS | ROCCSD(T)/aug-cc-pVQZ | UCCSD(T)/aug-cc-pVQZ |
|--------------------|-------------|-----------------------|----------------------|
| i5                 | 0.5         | 0.5                   | 0.5                  |
| TS4                | 3.1         | 3.1                   | 3.1                  |
| i6                 | 0.0         | 0.0                   | 0.0                  |
| TS3                | 53.7        | 53.8                  | 53.9                 |
| i7                 | 28.8        | 29.3                  | 29.2                 |
| TS5                | 58.4        | 57.8                  | 57.9                 |
| i8                 | 47.5        | 46.8                  | 46.8                 |
| TS6                | 55.9        | 56.4                  | 56.3                 |
| AsO+H <sub>2</sub> | 27.4        | 26.5                  | 27.1                 |

**Table S6.** Relative energy gap (in  $\text{kcal mol}^{-1}$ ) among the  $\text{H}_2\text{AsO}$  isomers

| Method                | i6  | i5  | i7   | i8   |
|-----------------------|-----|-----|------|------|
| CCSD(T)/CBS           | 0.0 | 0.5 | 28.8 | 47.5 |
| ROCCSD(T)/aug-cc-pVQZ | 0.0 | 0.5 | 29.3 | 46.8 |
| UCCSD(T)/aug-cc-pVQZ  | 0.0 | 0.5 | 29.2 | 46.8 |
| G4*                   | 0.0 | 0.4 | 28.2 | 47.0 |
| G4MP2*                | 0.0 | 0.4 | 28.5 | 48.0 |
| G4                    | 0.0 | 0.4 | 32.7 | 42.4 |
| G4MP2                 | 0.0 | 0.4 | 32.9 | 43.4 |

**Table S7.** Arsenic [q(As)] and oxygen [q(O)] partial atomic charge by different population methodologies

| Molecule   | NPA   |       | QTAIM |       | CHELP |       | CHELPG |       | MK    |       | CM5   |       |
|------------|-------|-------|-------|-------|-------|-------|--------|-------|-------|-------|-------|-------|
|            | q(As) | q(O)  | q(As) | q(O)  | q(As) | q(O)  | q(As)  | q(O)  | q(As) | q(O)  | q(As) | q(O)  |
| AsO        | 0.88  | -0.88 | 0.95  | -0.95 | 0.36  | -0.36 | 0.35   | -0.35 | 0.34  | -0.34 | 0.30  | -0.30 |
| <b>i1</b>  | 1.07  | -0.89 | 1.32  | -0.98 | 0.41  | -0.37 | 0.40   | -0.38 | 0.38  | -0.37 | 0.38  | -0.32 |
| <b>i2</b>  | 0.61  | -0.57 | 0.90  | -0.70 | 0.20  | -0.24 | 0.16   | -0.23 | 0.14  | -0.22 | 0.18  | -0.19 |
| <b>i3</b>  | 0.44  | -0.93 | 0.52  | -1.10 | 0.10  | -0.29 | 0.04   | -0.35 | 0.03  | -0.36 | 0.07  | -0.24 |
| <b>i4</b>  | 0.51  | -0.99 | 0.56  | -1.14 | 0.15  | -0.41 | 0.10   | -0.43 | 0.09  | -0.44 | 0.12  | -0.28 |
| <b>i5</b>  | 0.62  | -0.95 | 0.88  | -1.14 | 0.21  | -0.49 | 0.12   | -0.45 | 0.10  | -0.46 | 0.17  | -0.28 |
| <b>i6</b>  | 0.58  | -0.94 | 0.86  | -1.13 | 0.19  | -0.30 | 0.04   | -0.49 | 0.02  | -0.51 | 0.15  | -0.27 |
| <b>i7</b>  | 0.89  | -0.74 | 1.39  | -0.87 | 0.29  | -0.35 | 0.26   | -0.34 | 0.22  | -0.32 | 0.30  | -0.29 |
| <b>i8</b>  | -0.16 | -0.86 | -0.10 | -1.15 | -0.30 | -0.11 | -0.28  | -0.42 | -0.29 | -0.46 | -0.27 | -0.13 |
| <b>i9</b>  | 1.26  | -1.02 | 1.94  | -1.11 | 0.96  | -0.66 | 0.79   | -0.60 | 0.62  | -0.56 | 0.43  | -0.43 |
| <b>i10</b> | 0.66  | -0.96 | 1.19  | -1.15 | 0.30  | -0.52 | 0.04   | -0.49 | -0.01 | -0.52 | 0.21  | -0.30 |
| <b>i11</b> | 0.71  | -0.97 | 1.23  | -1.16 | 0.18  | -0.46 | 0.16   | -0.48 | 0.13  | -0.48 | 0.23  | -0.30 |
| <b>i12</b> | -0.09 | -0.84 | 0.21  | -1.15 | -0.23 | -0.17 | -0.32  | -0.54 | -0.35 | -0.58 | -0.21 | -0.13 |
| <b>i13</b> | -0.06 | -0.84 | 0.23  | -1.15 | -0.25 | -0.16 | -0.25  | -0.43 | -0.27 | -0.47 | -0.19 | -0.13 |

**Table S8.** Linear correlation between the  $\nu(\text{As-O})$  frequencies and  $\delta q$  [q(As)-q(O)] using the vibrational frequencies calculated with QCISD/cc-pVTZ and B3LYP/cc-pVTZ

| Method | B3LY  |       |
|--------|-------|-------|
|        | QCISD | P     |
| NPA    | 0.832 | 0.795 |
| QTAIM  | 0.531 | 0.483 |
| CHELP  | 0.692 | 0.648 |
| CHELPG | 0.618 | 0.600 |
| MK     | 0.662 | 0.642 |
| CM5    | 0.896 | 0.855 |

**Table S9.** Bond order analysis with bond delocalization index ( $bo_{bdi}$ ), natural resonance theory bond index ( $bo_{nrt}$ ), Mayer bond index ( $bo_{mayer}$ ), Wiberg bond index ( $bo_{wi}$ ), atom-atom overlap natural atomic orbital bond index ( $bo_{nao}$ ), and atom-atom overlap natural localized molecular orbitals/natural population analysis bond index ( $bo_{nlmo}$ )

| Molecule   | $bo_{wi}$ | $bo_{bdi}$ | $bo_{mayer}$ | $bo_{nrt}$ | $bo_{nao}$ | $bo_{nlmo}$ |
|------------|-----------|------------|--------------|------------|------------|-------------|
| AsO        | 1.59      | 1.76       | 2.03         | 1.50       | 0.99       | 1.12        |
| <b>i1</b>  | 1.63      | 1.75       | 2.08         | 2.03       | 0.93       | 1.08        |
| <b>i2</b>  | 1.03      | 1.09       | 1.26         | 1.82       | 0.74       | 0.86        |
| <b>i3</b>  | 0.97      | 1.30       | 1.25         | 2.00       | 0.66       | 0.57        |
| <b>i4</b>  | 0.74      | 1.02       | 1.20         | 1.52       | 0.61       | 0.5         |
| <b>i5</b>  | 0.76      | 0.94       | 1.01         | 1.49       | 0.59       | 0.52        |
| <b>i6</b>  | 0.77      | 0.97       | 1.02         | 1.50       | 0.59       | 0.53        |
| <b>i7</b>  | 1.15      | 1.16       | 1.52         | 1.50       | 0.88       | 1.24        |
| <b>i8</b>  | 0.31      | 0.63       | 0.39         | 1.00       | 0.27       | 0.17        |
| <b>i9</b>  | 1.21      | 1.31       | 1.86         | 1.13       | 1.21       | 0.82        |
| <b>i10</b> | 0.77      | 0.93       | 1.04         | 1.02       | 0.58       | 0.49        |
| <b>i11</b> | 0.76      | 0.90       | 1.02         | 1.01       | 0.58       | 0.48        |
| <b>i12</b> | 0.34      | 0.58       | 0.40         | 1.00       | 0.28       | 0.18        |
| <b>i13</b> | 0.34      | 0.94       | 0.39         | 1.00       | 0.28       | 0.18        |

**Table S10.** Linear correlation between the  $\nu(\text{As-O})$  frequencies and As-O bond order indexes using the vibrational frequencies calculated with QCISD/cc-pVTZ and B3LYP/cc-pVTZ

| Method       | QCISD | B3LYP |
|--------------|-------|-------|
| $bo_{wi}$    | 0.88  | 0.92  |
| $bo_{bdi}$   | 0.68  | 0.74  |
| $bo_{mayer}$ | 0.94  | 0.97  |
| $bo_{nrt}$   | 0.28  | 0.28  |
| $bo_{nao}$   | 0.9   | 0.91  |
| $bo_{nlmo}$  | 0.77  | 0.81  |

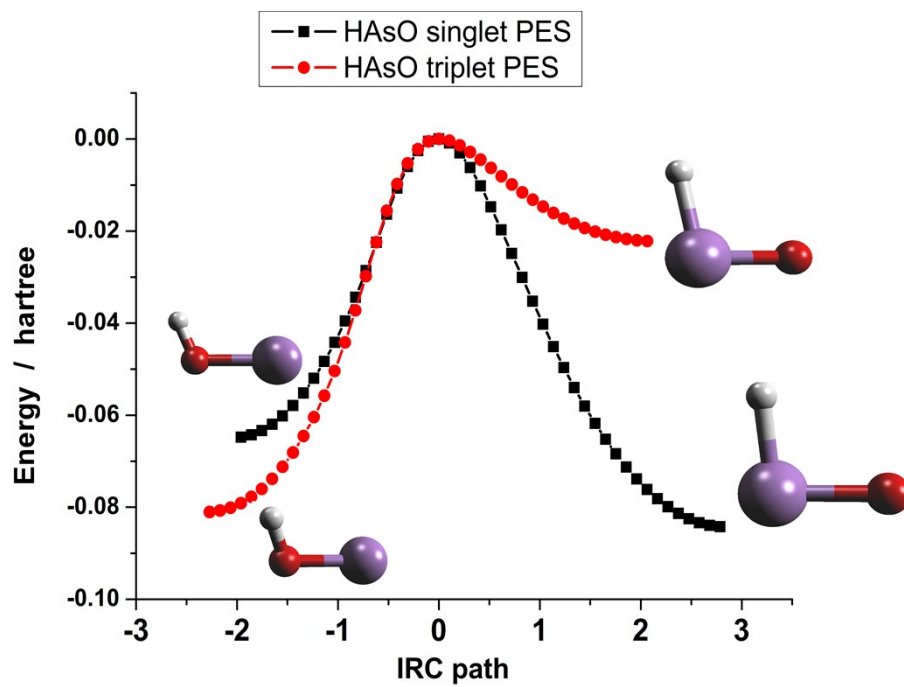

**Figure S1.** The HAsO singlet and triplet potential energy surfaces obtained by IRC calculations

HAsO (i1)

Charge = 0 Multiplicity = 1  
As,0,-0.0000045462,0.,0.0099762376  
H,0,0.0047569384,0.,1.5595289234  
O,0,1.5917954707,0.,-0.3324163068

HAsO (i2)

Charge = 0 Multiplicity = 3  
As,0,0.0017654856,0.,0.0100144732  
H,0,0.0015720984,0.,1.5293449005  
O,0,1.7260067256,0.,-0.1131522037

AsOH (i3)

Charge = 0 Multiplicity = 1  
As,0,0.0057652286,0.,0.0135137781  
O,0,-0.0030148675,0.,1.7748725332  
H,0,0.9016779412,0.,2.0994947547

AsOH (i4)

Charge = 0 Multiplicity = 3  
As,0,0.0075583598,0.,0.0158967372  
O,0,-0.0050710254,0.,1.796593505  
H,0,0.888626577,0.,2.1475483211

cis-HAsOH (i5)

Charge = 0 Multiplicity = 2  
O,0,0.0085349568,0.,-0.001854195  
H,0,0.0197651601,0.,0.9563838445  
As,0,1.6645542046,0.,-0.6658984035  
H,0,2.3966424818,0.,0.6698477101

trans-HAsOH (i6)

Charge = 0 Multiplicity = 2  
O,0,0.0037431526,0.,-0.0070136442  
H,0,0.0122314714,0.,0.9527251952  
As,0,1.6947643332,0.,-0.5863897692  
H,0,1.2612699153,0.,-2.0361776939

H<sub>2</sub>AsO (i7)

Charge = 0 Multiplicity = 2  
As,0,0.0078297497,0.0025357286,0.0066481335  
H,0,0.0025625199,0.0016311143,1.5153026995  
H,0,1.4956647764,0.0016311142,-0.243178359  
O,0,-0.5720119592,1.4990509633,-0.4856875444

AsOH<sub>2</sub> (i8)

Charge = 0 Multiplicity = 2  
O,0,0.0007625715,0.002991846,-0.002070777  
H,0,-0.0012883083,-0.0051807424,0.9580972878  
As,0,2.0367855924,-0.0006914342,-0.6939020206  
H,0,-0.4289342617,-0.8033543874,-0.2972996581

H<sub>3</sub>AsO (i9)

Charge = 0 Multiplicity = 1  
As,0,0.0027463138,-0.0035704209,0.0022326112  
H,0,0.0008302844,-0.0010794341,1.5023816713  
H,0,1.4709019074,-0.0010794341,-0.3059394618  
H,0,-0.3763332246,-1.4219447565,-0.3059394618  
O,0,-0.8847886144,1.1502938295,-0.7192874156

trans-H<sub>2</sub>AsOH (i10)

Charge = 0 Multiplicity = 1  
As,0,0.0059179462,0.0142654137,0.0057964852  
H,0,-0.0055554816,0.005768046,1.5176208564  
H,0,1.5171818571,0.0057683766,-0.0369371674  
O,0,-0.1895090286,1.7856424577,-0.1856289278  
H,0,-0.8658495925,1.9306632458,-0.8481289229

cis-H<sub>2</sub>AsOH (i11)

Charge = 0 Multiplicity = 1  
As,0,0.0080455474,0.0102366288,0.0079751325  
H,0,-0.0035327368,0.0121397871,1.5261731125  
H,0,1.5260825937,0.012139291,-0.0169779695  
O,0,-0.2814601854,1.7484861434,-0.2789918003  
H,0,0.279491381,2.2907183269,0.2770376719

trans-HAsOH<sub>2</sub> (i12)

Charge = 0 Multiplicity = 1  
As,0,0.0000547496,-0.0000888037,0.0035094897  
O,0,-0.0031400954,0.0050338441,2.1460730568  
H,0,0.9098252013,0.0016345158,2.4445473747  
H,0,-0.4017854838,-0.8163060153,2.4445471789  
H,0,-0.798591697,1.2805819815,0.087799336

cis-HAsOH<sub>2</sub> (i13)

Charge = 0 Multiplicity = 1  
As,0,0.0051914365,-0.0000048607,0.0034367311  
H,0,0.0259802675,0.0000064292,1.5231707609  
O,0,2.140327308,0.0000012506,0.0971261397  
H,0,2.4250155092,-0.7731079562,0.5910565444  
H,0,2.4250108602,0.7731140823,0.591053542

TS1

Charge = 0 Multiplicity = 1  
As,0,0.0066094458,0.,-0.0006522718  
O,0,0.0045907552,0.,1.7616531549  
H,0,1.1682568582,0.,1.0706096719

TS2

Charge = 0 Multiplicity = 3  
As,0,0.0104966412,0.,0.0101824566  
O,0,-0.0024553593,0.,1.7682569622  
H,0,1.2499892501,0.,1.0021929019

TS3

Charge = 0 Multiplicity = 2  
O,0,0.0066150191,-0.0029632787,0.009042428  
As,0,0.0084646311,-0.0091157097,1.7853056836  
H,0,1.5158846705,0.0015338355,2.0314442577  
H,0,-0.0265669897,-1.2373243468,0.7796590656

TS4

Charge = 0 Multiplicity = 2  
O,0,0.0043571425,-0.0035786568,-0.0075988618  
H,0,0.017568027,-0.006913802,0.9512371918  
As,0,1.6647134786,-0.0049554889,-0.6703483045  
H,0,1.8053638607,-1.5177284488,-0.8114113375

TS5

Charge = 0 Multiplicity = 2  
O,0,-0.0081169363,0.0034013799,-0.0066502603  
H,0,0.0170101964,-0.0071228129,0.9579625114  
As,0,1.9720015926,-0.0069508439,-0.5955390842  
H,0,0.6572474716,-0.9909433775,-0.4233301166

TS6

Charge = 0 Multiplicity = 2  
As,0,-0.0009634917,-0.0002507844,-0.0023092117  
H,0,0.0388944319,-0.0030123802,1.6355042711  
H,0,1.1350652421,-0.0030124058,1.178140014  
O,0,-0.0926428438,-1.662253478,-0.2220382038

TS7

Charge = 0 Multiplicity = 1  
As,0,0.0066775684,0.011255398,0.0063731429  
H,0,-0.002341021,0.0058425709,1.5210236359  
H,0,1.5263268892,0.0144500193,-0.0148788572  
O,0,-0.2604303653,1.7797657296,-0.1647448401  
H,0,0.4136745764,2.1608191111,-0.7281160386

TS8

Charge = 0 Multiplicity = 1  
As,0,-0.0003735422,0.003703995,0.0180067085  
O,0,-0.009793204,-0.0011401704,2.0784035478  
H,0,0.9238594542,0.0033008186,2.3199102892  
H,0,-1.4689594093,-0.3390165901,0.0507612888  
H,0,-0.1501094521,1.0045790787,1.3152394932

TS9

Charge = 0 Multiplicity = 1  
As,0,0.005518864,0.0100831698,0.0045813007  
H,0,0.0009124477,-0.0048468809,1.5105881455  
H,0,1.4849423783,-0.0048469864,-0.2771702167  
H,0,-1.1588680057,0.1831387045,-0.9619838951  
O,0,-0.8296001932,-1.3291110331,-0.6886564367

TS10

Charge = 0 Multiplicity = 1  
As,0,-0.0000928277,-0.0032831918,-0.0049715555  
O,0,-0.0000761969,-0.0028022037,2.1085182242  
H,0,0.7875709568,-0.0047497011,2.6500894659  
H,0,-0.7866822921,0.0376878635,2.6500924466  
H,0,-0.0408803282,-1.5161888832,0.063015776

TS11

Charge = 0 Multiplicity = 1  
As,0,0.0073161452,0.0120178103,0.0043249967  
O,0,0.0024164308,0.0032551081,1.7016318599  
H,0,1.5011741099,0.0148448373,-0.3709956718  
H,0,0.3182857555,1.3177290457,1.0755057992  
H,0,0.3630112701,1.7871061032,0.2530219038

TS12

Charge = 0 Multiplicity = 1  
As,0,0.0011123666,0.0030820137,0.0024899176  
H,0,0.0012644501,-0.0054551893,1.5097835406  
H,0,1.5117722553,-0.0198692028,-0.2629822475  
H,0,1.309426214,-0.9950141349,0.5788700681  
O,0,-1.0642610802,-0.9467520163,-0.7852076427

TS13

Charge = 0 Multiplicity = 1  
As  
O,1,B1  
H,1,B2,2,A1  
H,2,B3,1,A2,3,D1,0  
H,1,B4,2,A3,4,D2,0

Variables:

B1=1.71011221  
B2=1.56652061  
B3=1.49821411  
B4=1.86438785  
A1=104.18370376  
A2=65.211218  
A3=82.1302687  
D1=76.66567853  
D2=-2.10201119

TS14

Charge = 0 Multiplicity = 1  
As  
H,1,B1  
H,1,B2,2,A1  
H,1,B3,2,A2,3,D1,0  
O,1,B4,2,A3,4,D2,0

Variables:

B1=1.52605045  
B2=1.54737182  
B3=1.76197489  
B4=1.63886162  
A1=100.54755909  
A2=70.22446342  
A3=119.05804965  
D1=37.74183371  
D2=100.76629796
